# Supplementary material for: Microbleeds as a predictor of intracerebral haemorrhage and ischaemic stroke after a TIA or minor ischaemic stroke: a cohort study
Source: HighWire-hosted journal article supplement (doi:10.1136/bmjopen-2013-002575), 2013-01-01
Supplement: bmjopen-2013-002575supp_tables.pdf [file bmjopen-2013-002575supp_tables.pdf]

Supplementary table 1. Suggested protocol of MRI sequences.

|                      | Survey   | T1 SE       | T2 SE       | Gradient echo<br>T2 FFE-tra | Gradient echo<br>T2 FFE-cor |
|----------------------|----------|-------------|-------------|-----------------------------|-----------------------------|
| FOV (mm)             | 250      | 230         | 230         | 230                         | 230                         |
| Matrix scan          | 256      | 256         | 256         | 256                         | 256                         |
| reconstruction       | 256      | 256         | 256         | 256                         | 256                         |
| Scan percentage (%)  | 60       | 80          | 80          | 80                          | 80                          |
| # of slices          | 19       | 19          | 19          | 20                          | 20                          |
| Slice thickness (mm) | 4.00     | 6.00        | 6.00        | 5.00                        | 6.00                        |
| Slice gap (mm)       | 0.60     | 1.00        | 1.00        | 1.00                        | 1.00                        |
| Slice orientation    | saggital | transversal | transversal | transversal                 | coronal                     |
| Scan technique       | SE       | SR          | SE          | FFE                         | FFE                         |
| Echoes               | 1        | 1           | 2           | 1                           | 1                           |
| TE (ms)              | 15       | 18          |             | 27.6                        | 27.6                        |
| first (ms)           |          |             | 28          |                             |                             |
| second (ms)          |          |             | 60          |                             |                             |
| Flip angle           |          |             |             | 20                          | 20                          |
| TR (ms)              | 512      | 589         | 1380        | 705                         | 705                         |
| TR SE (ms)           |          | 597.8       |             |                             |                             |

Supplementary table 2. T2\*W FFE transversal MRI parameters used in the different centres.

|                       | UMCU | UMCU | Slotervaart | MST  | Antonius | Meander |
|-----------------------|------|------|-------------|------|----------|---------|
| magnet field strength | 0.5T | 1.5T | 1.0T        | 1.5T | 1.5T     | 1.0T    |
| number of slices      | 19   | 20   | 22          | 20   | 22       | 20      |
| slice thickness (mm)  | 6.0  | 6.0  | 5.0         | 6.0  | 5.0      | 6.0     |
| slice gap (mm)        | 1.2  | 1.2  | 1.0         | 1.2  | 1.0      | 0.6     |
| echoes                | 1    | 1    | 1           | 1    | 1        | 1       |
| TE (ms)               | 27   | 23   | 21          | 27   | 23       | 18      |
| flip angle            | 15   | 20   | 15          | 15   | unk.     | 20      |
| TR (ms)               | 848  | 663  | 680         | 847  | 668      | 612     |

unk. = unknown

UMCU = University Medical Centre, Utrecht

MST = Medisch Spectrum Twente, Enschede

Supplementary table 3. Baseline characteristics of patients with and without

FFE-gradient echo MRI

|                                  | <b>Without FFE-<br/>gradient echo*</b> | <b>With FFE-<br/>gradient echo*</b> |
|----------------------------------|----------------------------------------|-------------------------------------|
|                                  | <b>N= 51</b>                           | <b>N= 397</b>                       |
| <b>Mean age (sd)</b>             | 60.0 (12.3) yr                         | 65.3 (12.2) yr                      |
| <b>Men</b>                       | 30 (59%)                               | 232 (58%)                           |
| <b>White European ethnicity</b>  | 49 (96%)                               | 395 (99%)                           |
| <b>Median Rankin score</b>       |                                        |                                     |
| <b>0</b>                         | 13 (25%)                               | 174 (44%)                           |
| <b>1</b>                         | 19 (37%)                               | 125 (32%)                           |
| <b>≥ 2</b>                       | 19 (37%)                               | 98 (25%)                            |
| <b>Hypertension</b>              | 24 (47%)                               | 218 (55%)                           |
| <b>Diabetes mellitus</b>         | 9 (18%)                                | 54 (14%)                            |
| <b>Smoking</b>                   | 23 (45%)                               | 107 (27%)                           |
| <b>Hyperlipidaemia</b>           | 10 (20%)                               | 165 (42%)                           |
| <b>Atrial fibrillation</b>       | 0 (0%)                                 | 30 (8%)                             |
| <b>Previous ischaemic stroke</b> | 5 (10%)                                | 35 (9%)                             |

\* numbers (%), unless stated otherwise

Supplementary table 4. Proportion of subtypes of ischemic strokes in patients with and without microbleeds.

|                     | <b>LACI</b> | <b>PACI</b> | <b>POCI</b> | <b>Totaal</b> |
|---------------------|-------------|-------------|-------------|---------------|
| <b>microbleed +</b> | 4 (67%)     | 2 (33%)     | 0           | 6             |
| <b>microbleed -</b> | 6 (35%)     | 9 (53%)     | 2 (12%)     | 17            |

Oxford classification of subtypes of cerebral infarction:

LACI = lacunar infarcts

PACI = partial anterior circulation infarcts

POCI = posterior circulation infarcts
